# Supplementary material for: Generalized correlation coefficient for genome-wide association analysis of cognitive ability in twins
Source: publisher site journal article supplement (doi:10.18632/aging.104198), 2020-11-21
Supplement: Supplementary file [file aging-v12i22-104198-supplementary-material-SD2.pdf]

## SUPPLEMENTARY TABLES

**Supplementary Table 1. Summary statistics for the top 30 SNPs identified in the GWAS of cognitive function in Danish samples using the GCC model. A and rawA are association scores from the matie R package.**

| Chr:Position | SNP ID      | A1 | A2 | MAF*   | INFO* | A      | rawA   | P-value  |
|--------------|-------------|----|----|--------|-------|--------|--------|----------|
| 2:137996342  | rs71419535  | C  | T  | 0.248  | 0.994 | 0.0920 | 0.0397 | 1.47e-08 |
| 5:26779974   | rs905838    | G  | A  | 0.401  | 0.967 | 0.0916 | 0.0394 | 1.69e-08 |
| 22:47168581  | rs6008973   | A  | G  | 0.453  | 0.963 | 0.0879 | 0.0368 | 6.19e-08 |
| 15:99584066  | rs8023294   | G  | A  | 0.068  | 0.912 | 0.0858 | 0.0354 | 1.23e-07 |
| 8:70935439   | rs56065347  | A  | G  | 0.168  | 0.992 | 0.0854 | 0.0352 | 1.42e-07 |
| 17:4103051   | rs62064368  | T  | A  | 0.051  | 0.900 | 0.0848 | 0.0347 | 1.74e-07 |
| 9:118044633  | rs1100324   | G  | A  | 0.500  | 0.990 | 0.0847 | 0.0347 | 1.79e-07 |
| 8:50093277   | rs1509086   | T  | C  | 0.473  | 0.999 | 0.0841 | 0.0343 | 2.16e-07 |
| 21:22035477  | rs2826435   | A  | C  | 0.161  | 0.951 | 0.0840 | 0.0342 | 2.25e-07 |
| 11:108908881 | rs11604258  | A  | G  | 0.132  | 0.993 | 0.0837 | 0.0340 | 2.46e-07 |
| 15:87071809  | rs4516199   | G  | A  | 0.478  | 0.939 | 0.0835 | 0.0339 | 2.66e-07 |
| 5:74310301   | rs115636606 | G  | A  | 0.077  | 0.992 | 0.0834 | 0.0338 | 2.71e-07 |
| 9:137397211  | rs7859114   | T  | C  | 0.146  | 0.653 | 0.0831 | 0.0337 | 2.97e-07 |
| 1:115369112  | rs6689326   | T  | A  | 0.460  | 0.996 | 0.0831 | 0.0336 | 3.01e-07 |
| 13:30798807  | rs861727    | G  | C  | 0.333  | 0.940 | 0.0826 | 0.0333 | 3.49e-07 |
| 7:148734042  | rs4483075   | T  | C  | 0.105  | 0.820 | 0.0822 | 0.0331 | 3.96e-07 |
| 12:57835965  | rs2943693   | C  | T  | 0.222  | 0.972 | 0.0818 | 0.0328 | 4.53e-07 |
| 6:109522751  | rs1271693   | T  | C  | 0.298  | 0.997 | 0.0817 | 0.0327 | 4.66e-07 |
| 7:126707558  | rs3808123   | T  | C  | 0.419  | 0.998 | 0.0816 | 0.0326 | 4.84e-07 |
| 15:102066194 | rs2084151   | G  | C  | 0.452  | 0.994 | 0.0813 | 0.0324 | 5.33e-07 |
| 8:96229494   | rs74306623  | G  | A  | 0.162  | 0.916 | 0.0812 | 0.0324 | 5.43e-07 |
| 3:192325362  | rs7610664   | T  | C  | 0.158  | 0.900 | 0.0810 | 0.0323 | 5.71e-07 |
| 9:25743020   | rs10491876  | G  | A  | 0.129  | 0.647 | 0.0809 | 0.0322 | 5.90e-07 |
| 15:78231397  | rs12901519  | A  | G  | 0.280  | 0.889 | 0.0808 | 0.0322 | 6.06e-07 |
| 1:235095444  | rs2802929   | A  | G  | 0.358  | 0.679 | 0.0806 | 0.0320 | 6.53e-07 |
| 5:9872558    | rs2963897   | A  | G  | 0.339  | 0.650 | 0.0797 | 0.0314 | 8.71e-07 |
| 5:57640137   | rs245295    | A  | T  | 0.094  | 0.990 | 0.0795 | 0.0313 | 9.24e-07 |
| 16:75377514  | rs9939080   | A  | G  | 0.20   | 0.749 | 0.0793 | 0.0312 | 9.60e-07 |
| 7:22098259   | rs1833111   | G  | A  | 0.3550 | 0.749 | 0.0792 | 0.0312 | 9.88e-07 |
| 1:207421048  | rs7535029   | A  | G  | 0.320  | 0.996 | 0.0789 | 0.0309 | 1.11e-06 |

\*MAF = Minor allele Frequency,

\*INFO = Information metric score from the imputation.

**Supplementary Table 2. Summary statistic for the top 30 SNPs from Kinship model in Danish GWAS.**

| Chr:Position | SNPID      | A1 | A2 | MAF*   | INFO*  | BETA    | SE     | Z     | P-value  |
|--------------|------------|----|----|--------|--------|---------|--------|-------|----------|
| 1:108393718  | rs72707744 | G  | A  | 0.1012 | 0.7436 | -3.6972 | 0.6919 | -5.34 | 9.11e-08 |
| 15:80099089  | rs34903151 | T  | C  | 0.105  | 0.922  | 3.0052  | 0.6464 | 4.65  | 3.34e-06 |
| 15:80099202  | rs59367695 | G  | A  | 0.106  | 0.925  | 2.9949  | 0.6456 | 4.64  | 3.50e-06 |
| 2:53701324   | rs903227   | C  | T  | 0.179  | 0.959  | -2.3474 | 0.508  | -4.62 | 3.82e-06 |
| 3:143762041  | rs4839678  | G  | A  | 0.1656 | 0.7519 | -2.6011 | 0.5639 | -4.61 | 3.98e-06 |
| 13:26639396  | rs7491901  | A  | G  | 0.4421 | 0.9979 | 1.8016  | 0.392  | 4.6   | 4.30e-06 |
| 13:26642629  | rs7321426  | C  | T  | 0.4415 | 0.9973 | 1.7984  | 0.3923 | 4.58  | 4.57e-06 |
| 13:26641424  | rs9512064  | C  | G  | 0.4416 | 0.9977 | 1.7949  | 0.3922 | 4.58  | 4.72e-06 |
| 13:26640931  | rs9553716  | T  | A  | 0.4418 | 0.9976 | 1.7931  | 0.3922 | 4.57  | 4.84e-06 |
| 13:26634144  | rs9512063  | T  | C  | 0.4416 | 0.9984 | 1.7918  | 0.3923 | 4.57  | 4.94e-06 |
| 13:26638368  | rs1853720  | C  | A  | 0.4415 | 0.9987 | 1.7913  | 0.3923 | 4.57  | 4.97e-06 |
| 13:26636704  | rs7317113  | C  | T  | 0.4415 | 0.9981 | 1.7908  | 0.3923 | 4.56  | 5.00e-06 |
| 1:78623626   | rs17391694 | C  | T  | 0.1320 | 1      | 2.532   | 0.5582 | 4.54  | 5.74e-06 |
| 15:80119888  | rs16971397 | A  | G  | 0.117  | 0.969  | 2.7288  | 0.6043 | 4.52  | 6.31e-06 |
| 8:37669354   | rs10089977 | T  | C  | 0.2318 | 0.6758 | 2.4104  | 0.5341 | 4.51  | 6.39e-06 |
| 15:80103298  | rs66588428 | C  | G  | 0.1103 | 0.941  | 2.8405  | 0.6332 | 4.49  | 7.26e-06 |
| 15:80100919  | rs7183155  | A  | T  | 0.1098 | 0.932  | 2.8574  | 0.6372 | 4.48  | 7.31e-06 |
| 13:26637596  | rs4770916  | C  | T  | 0.442  | 1      | 1.7614  | 0.3936 | 4.48  | 7.62e-06 |
| 4:178681212  | rs10222887 | G  | T  | 0.3944 | 0.9902 | 1.6841  | 0.3793 | 4.44  | 8.99e-06 |
| 15:80151536  | rs12912711 | G  | A  | 0.112  | 0.981  | 2.7315  | 0.6165 | 4.43  | 9.41e-06 |
| 15:80123923  | rs9888692  | G  | A  | 0.113  | 0.992  | 2.7027  | 0.6108 | 4.43  | 9.64e-06 |
| 15:80122034  | rs71409256 | G  | A  | 0.113  | 0.993  | 2.701   | 0.6108 | 4.42  | 9.80e-06 |
| 15:80143118  | rs8033289  | G  | A  | 0.112  | 0.986  | 2.7199  | 0.6156 | 4.42  | 9.96e-06 |
| 15:80131092  | rs7174937  | G  | A  | 0.113  | 0.990  | 2.7092  | 0.6134 | 4.42  | 1.00e-05 |
| 15:80141806  | rs36060920 | C  | G  | 0.112  | 0.9868 | 2.7178  | 0.6155 | 4.42  | 1.01e-05 |
| 15:80140678  | rs36107316 | C  | T  | 0.113  | 0.987  | 2.7176  | 0.6157 | 4.41  | 1.01e-05 |
| 6:124643640  | rs2626123  | G  | C  | 0.2500 | 0.8012 | -2.1333 | 0.4836 | -4.41 | 1.03e-05 |
| 4:6196861    | rs11729302 | C  | G  | 0.1158 | 0.6010 | -3.3278 | 0.7559 | -4.4  | 1.07e-05 |
| 15:80137560  | exm1181778 | T  | C  | 0.113  | 1      | 2.6806  | 0.6094 | 4.4   | 1.09e-05 |
| 8:1886823    | rs747689   | C  | T  | 0.3534 | 0.7651 | 1.9831  | 0.45   | 4.4   | 1-10e-05 |

\*MAF = Minor allele Frequency,

\*INFO = Information metric score from the imputation.

**Supplementary Table 3. Summary statistic for the top 30 SNPs from LME model in Danish GWAS.**

| Chr:Position | SNP ID     | A1 | A2 | MAF*   | INFO*  | Coef    | tval    | SE     | P-value  |
|--------------|------------|----|----|--------|--------|---------|---------|--------|----------|
| 1:108393718  | rs72707744 | G  | A  | 0.1012 | 0.7436 | -3.6972 | -5.3437 | 0.6919 | 1.10e-07 |
| 15:80099089  | rs34903151 | T  | C  | 0.105  | 0.922  | 3.0052  | 4.649   | 0.6464 | 3.73e-06 |
| 15:80099202  | rs59367695 | G  | A  | 0.106  | 0.925  | 2.9949  | 4.6391  | 0.6456 | 3.91e-06 |
| 2:53701324   | rs903227   | C  | T  | 0.179  | 0.959  | -2.3474 | -4.6206 | 0.508  | 4.27e-06 |
| 3:143762041  | rs4839678  | G  | A  | 0.1656 | 0.7519 | -2.6011 | -4.6124 | 0.5639 | 4.43e-06 |
| 13:26639396  | rs7491901  | A  | G  | 0.4421 | 0.9979 | 1.8016  | 4.5964  | 0.392  | 4.78e-06 |
| 13:26642629  | rs7321426  | C  | T  | 0.4415 | 0.9973 | 1.7984  | 4.5836  | 0.3923 | 5.08e-06 |
| 13:26641424  | rs9512064  | C  | G  | 0.4416 | 0.9977 | 1.7949  | 4.5767  | 0.3922 | 5.25e-06 |
| 13:26640931  | rs9553716  | T  | A  | 0.4418 | 0.9976 | 1.7931  | 4.5716  | 0.3922 | 5.37e-06 |
| 13:26634144  | rs9512063  | T  | C  | 0.4416 | 0.9984 | 1.7918  | 4.5675  | 0.3923 | 5.48e-06 |
| 13:26638368  | rs1853720  | C  | A  | 0.4415 | 0.9987 | 1.7913  | 4.5659  | 0.3923 | 5.52e-06 |
| 13:26636704  | rs7317113  | C  | T  | 0.4415 | 0.9981 | 1.7908  | 4.5649  | 0.3923 | 5.54e-06 |
| 1:78623626   | rs17391694 | C  | T  | 0.1320 | 1      | 2.532   | 4.5357  | 0.5582 | 6.35e-06 |
| 15:80119888  | rs16971397 | A  | G  | 0.117  | 0.969  | 2.7288  | 4.5158  | 0.6043 | 6.97e-06 |
| 8:37669354   | rs10089977 | T  | C  | 0.2318 | 0.6758 | 2.4104  | 4.5131  | 0.5341 | 7.04e-06 |
| 15:80103298  | rs66588428 | C  | G  | 0.1103 | 0.941  | 2.8405  | 4.4859  | 0.6332 | 8.00e-06 |
| 15:80100919  | rs7183155  | A  | T  | 0.1098 | 0.932  | 2.8574  | 4.4845  | 0.6372 | 8.05e-06 |
| 13:26637596  | rs4770916  | C  | T  | 0.442  | 1      | 1.7614  | 4.4756  | 0.3936 | 8.39e-06 |
| 4:178681212  | rs10222887 | C  | T  | 0.3944 | 0.9902 | 1.6841  | 4.4401  | 0.3793 | 9.87e-06 |
| 15:80151536  | rs12912711 | G  | A  | 0.112  | 0.981  | 2.7315  | 4.4303  | 0.6166 | 1.03e-05 |
| 15:80123923  | rs9888692  | G  | A  | 0.113  | 0.992  | 2.7027  | 4.4251  | 0.6108 | 1.06e-05 |
| 15:80122034  | rs71409256 | G  | A  | 0.113  | 0.993  | 2.7009  | 4.4216  | 0.6108 | 1.07e-05 |
| 15:80143118  | rs8033289  | G  | A  | 0.112  | 0.986  | 2.7198  | 4.4179  | 0.6156 | 1.09e-05 |
| 15:80131092  | rs7174937  | G  | A  | 0.113  | 0.990  | 2.7092  | 4.417   | 0.6134 | 1.10e-05 |
| 15:80141806  | rs36060920 | C  | G  | 0.112  | 0.9868 | 2.7178  | 4.4159  | 0.6155 | 1.10e-05 |
| 15:80140678  | rs36107316 | C  | T  | 0.113  | 0.987  | 2.7176  | 4.4142  | 0.6157 | 1.11e-05 |
| 6:124643640  | rs2626123  | G  | C  | 0.2500 | 0.8012 | -2.1333 | -4.4114 | 0.4836 | 1.13e-05 |
| 4:6196861    | rs11729302 | C  | G  | 0.1158 | 0.6010 | -3.3278 | -4.4021 | 0.756  | 1.17e-05 |
| 15:80137560  | exm1181778 | T  | C  | 0.113  | 1      | 2.6806  | 4.3991  | 0.6094 | 1.19e-05 |
| 4:43193184   | rs62299190 | T  | C  | 0.1139 | 0.8934 | 2.7868  | 4.3958  | 0.634  | 1.21e-05 |

\*MAF = Minor allele Frequency,

\*INFO = Information metric score.

**Supplementary Table 4. Summary statistic for the top 30 SNPs from GCC in Chinese GWAS. A and rawA are association scores from matie R package.**

| Chr: Position | SNP ID     | A1 | A2 | MAF*    | INFO*   | A      | rawA   | P-value  |
|---------------|------------|----|----|---------|---------|--------|--------|----------|
| 3:183681056   | rs2292999  | T  | G  | 0.15108 | 1       | 0.2501 | 0.1697 | 9.27e-10 |
| 4:93505196    | rs17019635 | A  | G  | 0.4479  | 0.99973 | 0.2436 | 0.1628 | 2.50e-09 |
| 11:20440691   | rs12362967 | A  | G  | 0.2532  | 0.99503 | 0.2188 | 0.1373 | 8.95e-08 |
| 15:38153188   | rs1502398  | A  | T  | 0.23565 | 0.99978 | 0.2151 | 0.1336 | 1.49e-07 |
| 2:63447200    | rs13417792 | G  | T  | 0.05039 | 0.99921 | 0.2150 | 0.1335 | 1.51e-07 |
| 2:63439916    | rs62177776 | C  | A  | 0.0543  | 0.91907 | 0.2146 | 0.1332 | 1.58e-07 |
| 3:194620090   | rs61253693 | G  | A  | 0.23285 | 0.99638 | 0.2140 | 0.1326 | 1.71e-07 |
| 6:33459420    | rs11757081 | A  | T  | 0.08714 | 0.98874 | 0.2138 | 0.1323 | 1.78e-07 |
| 6:164790026   | rs10945984 | C  | T  | 0.45905 | 0.97115 | 0.2097 | 0.1282 | 3.07e-07 |
| 12:130968399  | rs59068957 | G  | A  | 0.15953 | 0.94953 | 0.2093 | 0.1278 | 3.25e-07 |
| 2:9278695     | rs7590864  | T  | A  | 0.10432 | 0.99966 | 0.2091 | 0.1276 | 3.31e-07 |
| 13:111036022  | rs9515200  | G  | C  | 0.44155 | 0.9936  | 0.2090 | 0.1275 | 3.36e-07 |
| 19:14241153   | rs8112885  | A  | G  | 0.10304 | 0.99419 | 0.2079 | 0.1264 | 3.91e-07 |
| 16:3181996    | rs11649450 | G  | A  | 0.1781  | 0.90386 | 0.2078 | 0.1263 | 3.95e-07 |
| 3:110692754   | rs1462795  | T  | C  | 0.46763 | 1       | 0.2066 | 0.1251 | 4.64e-07 |
| 1:219903142   | rs4120823  | C  | T  | 0.31726 | 0.98683 | 0.2066 | 0.1251 | 4.65e-07 |
| 7:17554180    | rs7808662  | G  | A  | 0.25336 | 0.9957  | 0.2052 | 0.1237 | 5.54e-07 |
| 4:10558320    | rs17382947 | A  | G  | 0.09376 | 0.98675 | 0.2042 | 0.1227 | 6.38e-07 |
| 7:6964606     | rs58404784 | C  | T  | 0.11034 | 0.76589 | 0.2037 | 0.1222 | 6.74e-07 |
| 3:65958585    | rs17074200 | A  | T  | 0.266   | 0.99904 | 0.2036 | 0.1221 | 6.87e-07 |
| 15:96698614   | rs727895   | T  | G  | 0.47377 | 0.99825 | 0.2021 | 0.1207 | 8.30e-07 |
| 10:124213046  | rs61871747 | C  | T  | 0.45393 | 0.9945  | 0.2014 | 0.1199 | 9.13e-07 |
| 6:41222926    | rs1872245  | C  | T  | 0.34691 | 0.99671 | 0.2012 | 0.1197 | 9.39e-07 |
| 8:18469146    | rs77159425 | A  | G  | 0.11372 | 0.98384 | 0.2011 | 0.1197 | 9.43e-07 |
| 7:76927290    | rs76326531 | G  | T  | 0.19772 | 0.98887 | 0.2008 | 0.1193 | 9.88e-07 |
| 16:3181963    | rs1053871  | T  | C  | 0.1788  | 0.9017  | 0.2008 | 0.1193 | 9.91e-07 |
| 8:67171047    | rs74193350 | T  | C  | 0.12023 | 0.9973  | 0.1999 | 0.1184 | 1.11e-06 |
| 14:69078998   | rs7153168  | C  | T  | 0.16727 | 0.99998 | 0.1988 | 0.1174 | 1.27e-06 |
| 9:8011093     | rs4740923  | G  | A  | 0.05204 | 0.91471 | 0.1985 | 0.1170 | 1.33e-06 |
| 4:164850409   | rs55899995 | A  | G  | 0.05412 | 0.99699 | 0.1985 | 0.1170 | 1.33e-06 |

\*MAF = Minor allele Frequency,

\*INFO = Information metric score.

**Supplementary Table 5. Summary statistic for the top 30 SNPs from Kinship model in Chinese GWAS.**

| Chr: Position | SNP ID      | A1 | A2 | MAF*    | INFO*   | Beta      | SE      | z     | P-value  |
|---------------|-------------|----|----|---------|---------|-----------|---------|-------|----------|
| 10:89340206   | rs10749553  | A  | G  | 0.37741 | 0.93624 | -70.5629  | 13.6776 | -5.16 | 2.48e-07 |
| 1:77259107    | rs11577464  | A  | G  | 0.18385 | 0.9976  | -87.3978  | 17.0651 | -5.12 | 3.03e-07 |
| 10:89341315   | rs10749555  | A  | C  | 0.37628 | 0.94323 | -69.8189  | 13.6345 | -5.12 | 3.04e-07 |
| 1:77260333    | rs61783213  | C  | T  | 0.18491 | 0.96408 | -86.9847  | 17.1274 | -5.08 | 3.80e-07 |
| 13:31508724   | rs1331848   | A  | G  | 0.44958 | 0.99976 | 64.3429   | 12.8125 | 5.02  | 5.12e-07 |
| 17:12048104   | rs12944210  | A  | C  | 0.07151 | 0.98875 | -126.6781 | 25.7148 | -4.93 | 8.38e-07 |
| 10:77242460   | rs117082223 | G  | A  | 0.0603  | 0.63757 | 169.5016  | 34.6389 | 4.89  | 9.91e-07 |
| 10:89340727   | rs10887729  | A  | T  | 0.46505 | 0.93468 | -66.7767  | 13.7705 | -4.85 | 1.24e-06 |
| 8:61573242    | rs56274310  | C  | G  | 0.15584 | 0.93985 | 87.7518   | 18.1382 | 4.84  | 1.31e-06 |
| 13:31513622   | rs7319162   | T  | C  | 0.44242 | 0.9997  | 61.1840   | 12.8201 | 4.77  | 1.82e-06 |
| 13:31513145   | rs4943681   | G  | A  | 0.44245 | 1       | 61.1749   | 12.8188 | 4.77  | 1.82e-06 |
| 13:31512404   | rs2872194   | A  | G  | 0.44248 | 0.99981 | 61.1677   | 12.8205 | 4.77  | 1.83e-06 |
| 13:31512486   | rs2313006   | T  | C  | 0.44256 | 0.99939 | 61.1571   | 12.8222 | 4.77  | 1.85e-06 |
| 10:70280398   | rs78573780  | A  | T  | 0.31538 | 0.96562 | -70.4836  | 14.7817 | -4.77 | 1.86e-06 |
| 13:31509070   | rs7321378   | A  | T  | 0.44332 | 0.9977  | 60.8599   | 12.7927 | 4.76  | 1.96e-06 |
| 3:161523263   | rs1436738   | G  | A  | 0.06914 | 0.96809 | 117.1424  | 24.6759 | 4.75  | 2.06e-06 |
| 13:31509870   | rs7984339   | G  | A  | 0.44357 | 0.99829 | -60.9480  | 12.8439 | -4.75 | 2.08e-06 |
| 13:31507727   | rs1002036   | G  | T  | 0.43885 | 0.99999 | -62.8348  | 13.2757 | -4.73 | 2.21e-06 |
| 13:31528505   | rs59815783  | C  | T  | 0.44042 | 0.96004 | 61.7178   | 13.0697 | 4.72  | 2.33e-06 |
| 13:31514975   | rs61947599  | A  | G  | 0.44402 | 0.99701 | 60.7065   | 12.8565 | 4.72  | 2.34e-06 |
| 13:31513931   | rs2225505   | T  | A  | 0.44419 | 0.99913 | 60.6492   | 12.8448 | 4.72  | 2.34e-06 |
| 13:31513425   | rs7325107   | A  | G  | 0.44424 | 1       | 60.6235   | 12.8406 | 4.72  | 2.34e-06 |
| 1:77257353    | rs4949747   | A  | T  | 0.19922 | 0.96797 | -79.0279  | 16.7488 | -4.72 | 2.38e-06 |
| 10:70365455   | rs73276500  | A  | C  | 0.32545 | 0.95417 | -66.5443  | 14.1210 | -4.71 | 2.45e-06 |
| 13:31526533   | rs12864826  | T  | C  | 0.42596 | 0.99859 | 61.1288   | 12.9912 | 4.71  | 2.53e-06 |
| 13:31522359   | rs4943792   | C  | T  | 0.42601 | 0.9986  | 61.1191   | 12.9917 | 4.7   | 2.55e-06 |
| 13:31515563   | rs28582187  | T  | A  | 0.42624 | 0.99983 | 61.0835   | 12.9876 | 4.7   | 2.56e-06 |
| 13:31509744   | rs4941921   | G  | A  | 0.42626 | 0.99999 | 61.0794   | 12.9875 | 4.7   | 2.56e-06 |
| 13:31515301   | rs61580577  | G  | A  | 0.42626 | 1       | 61.0794   | 12.9875 | 4.7   | 2.56e-06 |
| 13:31517404   | rs12870193  | G  | A  | 0.42617 | 0.99911 | 61.0942   | 12.9908 | 4.7   | 2.57e-06 |

\*MAF = Minor allele Frequency,

\*INFO = Information metric score.

**Supplementary Table 6. Summary statistic for the top 30 SNPs from LME model in Chinese GWAS.**

| Chr: Position | SNP ID      | A1 | A2 | MAF*    | INFO*   | Coef      | SE      | t-value | P-value  |
|---------------|-------------|----|----|---------|---------|-----------|---------|---------|----------|
| 10:89340206   | rs10749553  | A  | G  | 0.37741 | 0.93624 | -70.6351  | 13.7296 | -5.1447 | 5.11e-07 |
| 10:89341315   | rs10749555  | A  | C  | 0.37628 | 0.94323 | -69.8916  | 13.6862 | -5.1067 | 6.14e-07 |
| 1:77259107    | rs11577464  | A  | G  | 0.18385 | 0.9976  | -87.2301  | 17.1337 | -5.0911 | 6.73e-07 |
| 1:77260333    | rs61783213  | C  | T  | 0.18491 | 0.96408 | -86.8156  | 17.1957 | -5.0487 | 8.23e-07 |
| 13:31508724   | rs1331848   | A  | G  | 0.44958 | 0.99976 | 64.2952   | 12.8663 | 4.9972  | 1.07e-06 |
| 17:12048104   | rs12944210  | A  | C  | 0.07151 | 0.98875 | -126.7369 | 25.8196 | -4.9085 | 1.60e-06 |
| 10:77242460   | rs117082223 | G  | A  | 0.0603  | 0.63757 | 169.3622  | 34.7934 | 4.8677  | 2.02e-06 |
| 10:89340727   | rs10887729  | A  | T  | 0.46505 | 0.93468 | -66.8073  | 13.8211 | -4.8337 | 2.23e-06 |
| 8:61573242    | rs56274310  | C  | G  | 0.15584 | 0.93985 | 87.5579   | 18.2082 | 4.8087  | 2.52e-06 |
| 10:70280398   | rs78573780  | A  | T  | 0.31538 | 0.96562 | -70.5498  | 14.8339 | -4.7560 | 3.19e-06 |
| 13:31513622   | rs7319162   | T  | C  | 0.44242 | 0.9997  | 61.1277   | 12.8743 | 4.7480  | 3.41e-06 |
| 13:31513145   | rs4943681   | G  | A  | 0.44245 | 1       | 61.1187   | 12.8730 | 4.7478  | 3.41e-06 |
| 13:31512404   | rs2872194   | A  | G  | 0.44248 | 0.99981 | 61.1114   | 12.8747 | 4.7466  | 3.43e-06 |
| 13:31512486   | rs2313006   | T  | C  | 0.44256 | 0.99939 | 61.1009   | 12.8763 | 4.7452  | 3.45e-06 |
| 3:161523263   | rs1436738   | G  | A  | 0.06914 | 0.96809 | 117.3295  | 24.7618 | 4.7383  | 3.46e-06 |
| 13:31509070   | rs7321378   | A  | T  | 0.44332 | 0.9977  | 60.7993   | 12.8465 | 4.7328  | 3.65e-06 |
| 13:31509870   | rs7984339   | G  | A  | 0.44357 | 0.99829 | -60.8889  | 12.8979 | -4.7208 | 3.85e-06 |
| 10:70365455   | rs73276500  | A  | C  | 0.32545 | 0.95417 | -66.5908  | 14.1752 | -4.6977 | 4.18e-06 |
| 13:31507727   | rs1002036   | G  | T  | 0.43885 | 0.99999 | -62.6854  | 13.3314 | -4.7021 | 4.19e-06 |
| 13:31528505   | rs59815783  | C  | T  | 0.44042 | 0.96004 | 61.6639   | 13.1247 | 4.6983  | 4.27e-06 |
| 13:31514975   | rs61947599  | A  | G  | 0.44402 | 0.99701 | 60.6452   | 12.9104 | 4.6974  | 4.28e-06 |
| 13:31513931   | rs2225505   | T  | A  | 0.44419 | 0.99913 | 60.5882   | 12.8987 | 4.6972  | 4.28e-06 |
| 13:31513425   | rs7325107   | A  | G  | 0.44424 | 1       | 60.5626   | 12.8944 | 4.6968  | 4.29e-06 |
| 1:77257353    | rs4949747   | A  | T  | 0.19922 | 0.96797 | -78.8652  | 16.8166 | -4.6897 | 4.38e-06 |
| 4:115490688   | rs112169253 | A  | C  | 0.05673 | 0.78317 | -143.0388 | 30.5930 | -4.6755 | 4.64e-06 |
| 13:31526533   | rs12864826  | T  | C  | 0.42596 | 0.99859 | 61.0632   | 13.0485 | 4.6797  | 4.72e-06 |
| 13:31522359   | rs4943792   | C  | T  | 0.42601 | 0.9986  | 61.0534   | 13.0491 | 4.6788  | 4.74e-06 |
| 13:31515563   | rs28582187  | T  | A  | 0.42624 | 0.99983 | 61.0180   | 13.0449 | 4.6775  | 4.77e-06 |
| 13:31509744   | rs4941921   | G  | A  | 0.42626 | 0.99999 | 61.0140   | 13.0449 | 4.6772  | 4.77e-06 |
| 13:31515301   | rs61580577  | G  | A  | 0.42626 | 1       | 61.0140   | 13.0449 | 4.6772  | 4.77e-06 |

\*MAF = Minor allele Frequency,

\*INFO = Information metric score

**Supplementary Table 7. Top 20 genes from the MAGMA gene-based analysis of the Danish GCC GWAS results.**

| <b>SYMBOL</b> | <b>CHR</b> | <b>START</b> | <b>STOP</b> | <b>NSNPS</b> | <b>NPARAM</b> | <b>N</b> | <b>ZSTAT</b> | <b>P-value</b> | <b>FDR</b> |
|---------------|------------|--------------|-------------|--------------|---------------|----------|--------------|----------------|------------|
| CSMD1         | 8          | 2782875      | 4862494     | 12973        | 488           | 1172     | 4.8682       | 5.63e-07       | 0.011      |
| PTPRD         | 9          | 8304246      | 10622723    | 7726         | 379           | 1172     | 4.148        | 1.68e-05       | 0.16       |
| RBFOX1        | 16         | 6059095      | 7773340     | 7791         | 369           | 1172     | 4.0358       | 2.72e-05       | 0.17       |
| CDH13         | 16         | 82650408     | 83840204    | 5249         | 284           | 1172     | 3.7244       | 9.79e-05       | 0.26       |
| WVOX          | 16         | 78123310     | 79256564    | 5054         | 278           | 1172     | 3.5371       | 0.000202       | 0.26       |
| CNTN4         | 3          | 2130497      | 3109645     | 3493         | 256           | 1172     | 3.4814       | 0.000249       | 0.26       |
| FHIT          | 3          | 59725036     | 61247133    | 4957         | 279           | 1172     | 3.3964       | 0.000341       | 0.26       |
| DPP6          | 7          | 153574182    | 154695995   | 3037         | 244           | 1172     | 3.3432       | 0.000414       | 0.26       |
| TMEM132D      | 12         | 129546270    | 130398211   | 2565         | 223           | 1172     | 3.3348       | 0.000427       | 0.26       |
| NPAS3         | 14         | 33394139     | 34283382    | 1963         | 214           | 1172     | 3.2302       | 0.000618       | 0.26       |
| CDH4          | 20         | 59817482     | 60525673    | 2223         | 187           | 1172     | 3.2198       | 0.000641       | 0.26       |
| MACROD2       | 20         | 13966015     | 16043842    | 4335         | 233           | 1172     | 3.1694       | 0.000764       | 0.26       |
| OPCML         | 11         | 132274871    | 133412414   | 2616         | 209           | 1172     | 3.1024       | 0.00096        | 0.26       |
| NTM           | 11         | 131230373    | 132216716   | 2400         | 186           | 1172     | 3.0947       | 0.000985       | 0.26       |
| DLGAP1        | 18         | 3486030      | 4465335     | 2480         | 224           | 1172     | 3.0724       | 0.00106        | 0.26       |
| KAZN          | 1          | 14915200     | 15454539    | 1511         | 143           | 1172     | 3.0629       | 0.0011         | 0.26       |
| CTNNA2        | 2          | 79402357     | 80885905    | 3473         | 215           | 1172     | 3.03         | 0.00122        | 0.26       |
| CNTNAP2       | 7          | 145803453    | 148128090   | 6261         | 209           | 1172     | 3.008        | 0.00131        | 0.26       |
| SORCS2        | 4          | 7184265      | 7754554     | 2406         | 210           | 1172     | 3.0043       | 0.00133        | 0.26       |
| ASIC2         | 17         | 31330105     | 32511983    | 3092         | 217           | 1172     | 2.9859       | 0.00141        | 0.26       |

**Supplementary Table 8. Top 20 genes from GCC model in Chinese data from MAGMA.**

| <b>SYMBOL</b> | <b>CHR</b> | <b>START</b> | <b>STOP</b> | <b>NSNPS</b> | <b>NPARAM</b> | <b>N</b> | <b>ZSTAT</b> | <b>P-value</b> | <b>FDR</b> |
|---------------|------------|--------------|-------------|--------------|---------------|----------|--------------|----------------|------------|
| CSMD1         | 8          | 2782875      | 4862494     | 12560        | 474           | 278      | 4.1834       | 1.44e-05       | 0.27       |
| PTPRD         | 9          | 8304246      | 10622723    | 7351         | 367           | 278      | 3.778        | 7.91e-05       | 0.29       |
| RBFOX1        | 16         | 6059095      | 7773340     | 7664         | 395           | 278      | 3.6857       | 0.000114       | 0.29       |
| NPAS3         | 14         | 33394139     | 34283382    | 1986         | 220           | 278      | 3.6352       | 0.000139       | 0.29       |
| WVOX          | 16         | 78123310     | 79256564    | 5118         | 317           | 278      | 3.3459       | 0.00041        | 0.29       |
| CDH13         | 16         | 82650408     | 83840204    | 4127         | 267           | 278      | 3.2772       | 0.000524       | 0.29       |
| CTNNA2        | 2          | 79402357     | 80885905    | 3820         | 267           | 278      | 3.1567       | 0.000798       | 0.29       |
| KSR2          | 12         | 117880817    | 118416788   | 1435         | 158           | 278      | 3.1535       | 0.000807       | 0.29       |
| DLGAP1        | 18         | 3486030      | 4465335     | 2422         | 226           | 278      | 3.1423       | 0.000838       | 0.29       |
| DAB1          | 1          | 57450451     | 59022406    | 3461         | 211           | 278      | 3.142        | 0.000839       | 0.29       |
| FRMD4A        | 10         | 13675706     | 14514141    | 2954         | 215           | 278      | 3.1174       | 0.000912       | 0.29       |
| TMEM132D      | 12         | 129546270    | 130398211   | 2659         | 238           | 278      | 3.1167       | 0.000915       | 0.29       |
| SORCS2        | 4          | 7184265      | 7754554     | 2084         | 206           | 278      | 3.1155       | 0.000918       | 0.29       |
| MACROD2       | 20         | 13966015     | 16043842    | 4120         | 248           | 278      | 3.1149       | 0.00092        | 0.29       |
| NELL1         | 11         | 20681117     | 21607227    | 2475         | 198           | 278      | 3.0328       | 0.00121        | 0.29       |
| RYR2          | 1          | 237195505    | 238007288   | 2183         | 165           | 278      | 3.0075       | 0.00132        | 0.29       |
| TMEM132C      | 12         | 128741948    | 129202460   | 1095         | 137           | 278      | 2.8947       | 0.0019         | 0.29       |
| TEX26         | 13         | 31496840     | 31559639    | 77           | 7             | 278      | 2.8887       | 0.00193        | 0.29       |
| LDLRAD4       | 18         | 13207497     | 13662754    | 985          | 114           | 278      | 2.8763       | 0.00201        | 0.29       |
| MAGI2         | 7          | 77636393     | 79092890    | 4052         | 224           | 278      | 2.872        | 0.00204        | 0.29       |



**Supplementary Table 9. The 49 significant (FDR< 0.05) KEGG pathways identified in the GSEA overrepresentation analysis based on genes found to have a p-value <0.05 in the gene-based analysis of GCC GWAS results in the Danish discovery sample.**

| Gene set names[# Genes (K)]                                       | Description                                            | #genes in overlap(K) | P-value               | FDR q-value           |
|-------------------------------------------------------------------|--------------------------------------------------------|----------------------|-----------------------|-----------------------|
| KEGG_PATHWAYS_IN_CANCER [325]                                     | Pathways in cancer                                     | 37                   | 1.08 e <sup>-12</sup> | 2.01 e <sup>-10</sup> |
| KEGG_AXON_GUIDANCE [129]                                          | Axon guidance                                          | 21                   | 1.16 e <sup>-10</sup> | 1.08 e <sup>-8</sup>  |
| KEGG_ARRHYTHMOGENIC_RIGHT_VENTRICULAR_AR_CARDIOMYOPATHY_ARVC [74] | Arrhythmogenic right ventricular cardiomyopathy (ARVC) | 15                   | 2.27 e <sup>-9</sup>  | 1.41 e <sup>-7</sup>  |
| KEGG_VASCULAR_SMOOTH_MUSCLE_CONTRACTION [115]                     | Vascular smooth muscle contraction                     | 18                   | 4.67 e <sup>-9</sup>  | 2.17 e <sup>-7</sup>  |
| KEGG_CALCIIUM_SIGNALING_PATHWAY [177]                             | Calcium signaling pathway                              | 22                   | 8.07 e <sup>-9</sup>  | 3 e <sup>-7</sup>     |
| KEGG_FOCAL_ADHESION [199]                                         | Focal adhesion                                         | 23                   | 1.51 e <sup>-8</sup>  | 4.67 e <sup>-7</sup>  |
| KEGG_MAPK_SIGNALING_PATHWAY [267]                                 | MAPK signaling pathway                                 | 25                   | 2.35 e <sup>-7</sup>  | 6.26 e <sup>-6</sup>  |
| KEGG_HYPERTROPHIC_CARDIOMYOPATHY_HCM [83]                         | Hypertrophic cardiomyopathy (HCM)                      | 13                   | 6.33 e <sup>-7</sup>  | 1.47 e <sup>-5</sup>  |
| KEGG_WNT_SIGNALING_PATHWAY [150]                                  | Wnt signaling pathway                                  | 17                   | 1.46 e <sup>-6</sup>  | 3.02 e <sup>-5</sup>  |
| KEGG_DILATED_CARDIOMYOPATHY [90]                                  | Dilated cardiomyopathy                                 | 13                   | 1.64 e <sup>-6</sup>  | 3.04 e <sup>-5</sup>  |
| KEGG_LONG_TERM_DEPRESSION [70]                                    | Long-term depression                                   | 11                   | 4.43 e <sup>-6</sup>  | 7.5 e <sup>-5</sup>   |
| KEGG_GNRH_SIGNALING_PATHWAY [101]                                 | GnRH signaling pathway                                 | 13                   | 6.09 e <sup>-6</sup>  | 9.44 e <sup>-5</sup>  |
| KEGG_ADHERENS_JUNCTION [73]                                       | Adherens junction                                      | 11                   | 6.75 e <sup>-6</sup>  | 9.65 e <sup>-5</sup>  |
| KEGG_O_GLYCAN_BIOSYNTHESIS [30]                                   | O-Glycan biosynthesis                                  | 7                    | 1.71 e <sup>-5</sup>  | 2.27 e <sup>-4</sup>  |
| KEGG_BASAL_CELL_CARCINOMA [55]                                    | Basal cell carcinoma                                   | 9                    | 2.34 e <sup>-5</sup>  | 2.9 e <sup>-4</sup>   |
| KEGG_HEDGEHOG_SIGNALING_PATHWAY [56]                              | Hedgehog signaling pathway                             | 9                    | 2.72 e <sup>-5</sup>  | 2.94 e <sup>-4</sup>  |
| KEGG_LEUKOCYTE_TRANSENDOTHELIAL_MIGRATION [116]                   | Leukocyte transendothelial migration                   | 13                   | 2.77 e <sup>-5</sup>  | 2.94 e <sup>-4</sup>  |
| KEGG_LONG_TERM_POTENTIATION [70]                                  | Long-term potentiation                                 | 10                   | 2.84 e <sup>-5</sup>  | 2.94 e <sup>-4</sup>  |
| KEGG_ERBB_SIGNALING_PATHWAY [87]                                  | ErbB signaling pathway                                 | 11                   | 3.7 e <sup>-5</sup>   | 3.62 e <sup>-4</sup>  |
| KEGG_REGULATION_OF_ACTIN_CYTOSKELETON [213]                       | Regulation of actin cytoskeleton                       | 18                   | 4.39 e <sup>-5</sup>  | 4.09 e <sup>-4</sup>  |
| KEGG_GAP_JUNCTION [90]                                            | Gap junction                                           | 11                   | 5.08 e <sup>-5</sup>  | 4.5 e <sup>-4</sup>   |
| KEGG_PHOSPHATIDYLINOSITOL_SIGNALING_SYSTEM [76]                   | Phosphatidylinositol signaling system                  | 10                   | 5.87 e <sup>-5</sup>  | 4.96 e <sup>-4</sup>  |
| KEGG_FC_EPSILON_RI_SIGNALING_PATHWAY [79]                         | Fc epsilon RI signaling pathway                        | 10                   | 8.2 e <sup>-5</sup>   | 6.63 e <sup>-4</sup>  |
| KEGG_CELL_ADHESION_MOLECULES_CAMS [133]                           | Cell adhesion molecules (CAMs)                         | 13                   | 1.16 e <sup>-4</sup>  | 8.96 e <sup>-4</sup>  |
| KEGG_NON_SMALL_CELL_LUNG_CANCER [54]                              | Non-small cell lung cancer                             | 8                    | 1.38 e <sup>-4</sup>  | 9.89 e <sup>-4</sup>  |
| KEGG_ECM_RECEPTOR_INTERACTION [84]                                | ECM-receptor interaction                               | 10                   | 1.38 e <sup>-4</sup>  | 9.89 e <sup>-4</sup>  |
| KEGG_TYPE_II_DIABETES_MELLITUS [47]                               | Type II diabetes mellitus                              | 7                    | 3.47 e <sup>-4</sup>  | 2.39 e <sup>-3</sup>  |
| KEGG_FC_GAMMA_R_MEDIATED_PHAGOCYTOSIS [96]                        | Fc gamma R-mediated phagocytosis                       | 10                   | 4.16 e <sup>-4</sup>  | 2.76 e <sup>-3</sup>  |
| KEGG_INSULIN_SIGNALING_PATHWAY [137]                              | Insulin signaling pathway                              | 12                   | 5.73 e <sup>-4</sup>  | 3.68 e <sup>-3</sup>  |
| KEGG_MELANOGENESIS [101]                                          | Melanogenesis                                          | 10                   | 6.24 e <sup>-4</sup>  | 3.87 e <sup>-3</sup>  |
| KEGG_SMALL_CELL_LUNG_CANCER [84]                                  | Small cell lung cancer                                 | 9                    | 6.5 e <sup>-4</sup>   | 3.9 e <sup>-3</sup>   |
| KEGG_ALDOSTERONE_REGULATED_SODIUM_REABSORPTION [42]               | Aldosterone-regulated sodium reabsorption              | 6                    | 1.15 e <sup>-3</sup>  | 6.69 e <sup>-3</sup>  |
| KEGG_B_CELL_RECEPTOR_SIGNALING_PATHWAY [75]                       | B cell receptor signaling pathway                      | 8                    | 1.32 e <sup>-3</sup>  | 7.44 e <sup>-3</sup>  |
| KEGG_CARDIAC_MUSCLE_CONTRACTION [78]                              | Cardiac muscle contraction                             | 8                    | 1.7 e <sup>-3</sup>   | 9.31 e <sup>-3</sup>  |
| KEGG_PURINE_METABOLISM [159]                                      | Purine metabolism                                      | 12                   | 2.09 e <sup>-3</sup>  | 1.08 e <sup>-2</sup>  |
| KEGG_NOTCH_SIGNALING_PATHWAY [47]                                 | Notch signaling pathway                                | 6                    | 2.09 e <sup>-3</sup>  | 1.08 e <sup>-2</sup>  |
| KEGG_NEUROACTIVE_LIGAND_RECEPTOR_INTERACTION [272]                | Neuroactive ligand-receptor interaction                | 17                   | 2.23 e <sup>-3</sup>  | 1.12 e <sup>-2</sup>  |
| KEGG_GLIOMA [65]                                                  | Glioma                                                 | 7                    | 2.47 e <sup>-3</sup>  | 1.21 e <sup>-2</sup>  |
| KEGG_GLYCEROLIPID_METABOLISM [49]                                 | Glycerolipid metabolism                                | 6                    | 2.59 e <sup>-3</sup>  | 1.24 e <sup>-2</sup>  |
| KEGG_CHEMOKINE_SIGNALING_PATHWAY [189]                            | Chemokine signaling pathway                            | 13                   | 3.14 e <sup>-3</sup>  | 1.44 e <sup>-2</sup>  |
| KEGG_GLYCOSAMINOGLYCAN_BIOSYNTHESIS_CHONDROITIN_SULFATE [22]      | Glycosaminoglycan biosynthesis - chondroitin sulfate   | 4                    | 3.18 e <sup>-3</sup>  | 1.44 e <sup>-2</sup>  |
| KEGG_PROSTATE_CANCER [89]                                         | Prostate cancer                                        | 8                    | 3.9 e <sup>-3</sup>   | 1.73 e <sup>-2</sup>  |
| KEGG_VIBRIO_CHOLERAE_INFECTION [54]                               | Vibrio cholerae infection                              | 6                    | 4.25 e <sup>-3</sup>  | 1.84 e <sup>-2</sup>  |
| KEGG_TIGHT_JUNCTION [132]                                         | Tight junction                                         | 10                   | 4.62 e <sup>-3</sup>  | 1.95 e <sup>-2</sup>  |
| KEGG_ENDOCYTOSIS [181]                                            | Endocytosis                                            | 12                   | 5.93 e <sup>-3</sup>  | 2.42 e <sup>-2</sup>  |

|                                                         |                                                 |    |                      |                      |
|---------------------------------------------------------|-------------------------------------------------|----|----------------------|----------------------|
| KEGG_NATURAL_KILLER_CELL_MEDIATED_CYTOTOXICITY [137]    | Natural killer cell mediated cytotoxicity       | 10 | 5.99 e <sup>-3</sup> | 2.42 e <sup>-2</sup> |
| KEGG_GLYCEROPHOSPHOLIPID_METABOLISM [77]                | Glycerophospholipid metabolism                  | 7  | 6.37 e <sup>-3</sup> | 2.52 e <sup>-2</sup> |
| KEGG_GLYCOSPHINGOLIPID_BIOSYNTHESIS_GANGLIO_SERIES [15] | Glycosphingolipid biosynthesis - ganglio series | 3  | 8.12 e <sup>-3</sup> | 3.15 e <sup>-2</sup> |
| KEGG_T_CELL_RECEPTOR_SIGNALING_PATHWAY [108]            | T cell receptor signaling pathway               | 8  | 1.22 e <sup>-2</sup> | 4.63 e <sup>-2</sup> |

**Supplementary Table 10. The 10 KEGG pathways overrepresented by genes in Kinship model from discovery sample with FDR < 0.05.**

| <b>Gene set names[# Genes (K)]</b>           | <b>Description</b>                  | <b>#genes in overlap(K)</b> | <b>P-value</b>       | <b>FDR q-value</b>   |
|----------------------------------------------|-------------------------------------|-----------------------------|----------------------|----------------------|
| KEGG_AXON_GUIDANCE [129]                     | Axon guidance                       | 13                          | 3.41 e <sup>-5</sup> | 6.35 e <sup>-3</sup> |
| KEGG_PPAR_SIGNALING_PATHWAY [69]             | PPAR signaling pathway              | 9                           | 7.43 e <sup>-5</sup> | 6.91 e <sup>-3</sup> |
| KEGG_CHEMOKINE_SIGNALING_PATHWAY [189]       | Chemokine signaling pathway         | 14                          | 4.67 e <sup>-4</sup> | 2.89 e <sup>-2</sup> |
| KEGG_FOCAL_ADHESION [199]                    | Focal adhesion                      | 14                          | 7.77 e <sup>-4</sup> | 3.61 e <sup>-2</sup> |
| KEGG_ECM_RECEPTOR_INTERACTION [84]           | ECM-receptor interaction            | 8                           | 1.57 e <sup>-3</sup> | 4.62 e <sup>-2</sup> |
| KEGG_CYSTEINE_AND_METHIONINE_METABOLISM [34] | Cysteine and methionine metabolism  | 5                           | 1.76 e <sup>-3</sup> | 4.62 e <sup>-2</sup> |
| KEGG_WNT_SIGNALING_PATHWAY [150]             | Wnt signaling pathway               | 11                          | 1.98 e <sup>-3</sup> | 4.62 e <sup>-2</sup> |
| KEGG_T_CELL_RECEPTOR_SIGNALING_PATHWAY [108] | T cell receptor signaling pathway   | 9                           | 2.09 e <sup>-3</sup> | 4.62 e <sup>-2</sup> |
| KEGG_TIGHT_JUNCTION [132]                    | Tight junction                      | 10                          | 2.46 e <sup>-3</sup> | 4.62 e <sup>-2</sup> |
| KEGG_AMYOTROPHIC_LATERAL_SCLEROSIS_ALS [53]  | Amyotrophic lateral sclerosis (ALS) | 6                           | 2.49 e <sup>-3</sup> | 4.62 e <sup>-2</sup> |

**Supplementary Table 11. The 12 KEGG pathways overrepresented by genes in LME model from discovery sample with FDR < 0.05.**

| Gene set names[# Genes (K)]                     | Description                          | #genes in overlap(K) | P-value              | FDR q-value          |
|-------------------------------------------------|--------------------------------------|----------------------|----------------------|----------------------|
| KEGG_AXON_GUIDANCE [129]                        | Axon guidance                        | 13                   | 3.01 e <sup>-5</sup> | 5.6 e <sup>-3</sup>  |
| KEGG_PPAR_SIGNALING_PATHWAY [69]                | PPAR signaling pathway               | 9                    | 6.77 e <sup>-5</sup> | 6.29 e <sup>-3</sup> |
| KEGG_CHEMOKINE_SIGNALING_PATHWAY [189]          | Chemokine signaling pathway          | 14                   | 4.14 e <sup>-4</sup> | 2.57 e <sup>-2</sup> |
| KEGG_FOCAL_ADHESION [199]                       | Focal adhesion                       | 14                   | 6.91 e <sup>-4</sup> | 3.21 e <sup>-2</sup> |
| KEGG_ECM_RECEPTOR_INTERACTION [84]              | ECM-receptor interaction             | 8                    | 1.45 e <sup>-3</sup> | 4.35 e <sup>-2</sup> |
| KEGG_CYSTEINE_AND_METHIONINE_METABOLISM [34]    | Cysteine and methionine metabolism   | 5                    | 1.67 e <sup>-3</sup> | 4.35 e <sup>-2</sup> |
| KEGG_WNT_SIGNALING_PATHWAY [150]                | Wnt signaling pathway                | 11                   | 1.8 e <sup>-3</sup>  | 4.35 e <sup>-2</sup> |
| KEGG_T_CELL_RECEPTOR_SIGNALING_PATHWAY [108]    | T cell receptor signaling pathway    | 9                    | 1.92 e <sup>-3</sup> | 4.35 e <sup>-2</sup> |
| KEGG_TIGHT_JUNCTION [132]                       | Tight junction                       | 10                   | 2.25 e <sup>-3</sup> | 4.35 e <sup>-2</sup> |
| KEGG_AMYOTROPHIC_LATERAL_SCLEROSIS_ALS [53]     | Amyotrophic lateral sclerosis (ALS)  | 6                    | 2.34 e <sup>-3</sup> | 4.35 e <sup>-2</sup> |
| KEGG_LEUKOCYTE_TRANSENDOTHELIAL_MIGRATION [116] | Leukocyte transendothelial migration | 9                    | 3.13 e <sup>-3</sup> | 4.92 e <sup>-2</sup> |
| KEGG_B_CELL_RECEPTOR_SIGNALING_PATHWAY [75]     | B cell receptor signaling pathway    | 7                    | 3.18 e <sup>-3</sup> | 4.92 e <sup>-2</sup> |

**Supplementary Table 12. The 35 KEGG pathways overrepresented by genes from GCC in replication sample with FDR < 0.05.**

| Gene Set Name [# Genes (K)]                                       | Description                                            | # Genes in Overlap (k) | p-value               | FDR q-value          |
|-------------------------------------------------------------------|--------------------------------------------------------|------------------------|-----------------------|----------------------|
| KEGG_PATHWAYS_IN_CANCER [325]                                     | Pathways in cancer                                     | 34                     | 9.48 e <sup>-12</sup> | 1.76 e <sup>-9</sup> |
| KEGG_ARRHYTHMOGENIC_RIGHT_VENTRICULAR_AR_CARDIOMYOPATHY_ARVC [74] | Arrhythmogenic right ventricular cardiomyopathy (ARVC) | 16                     | 7 e <sup>-11</sup>    | 6.51 e <sup>-9</sup> |
| KEGG_AXON_GUIDANCE [129]                                          | Axon guidance                                          | 19                     | 1.26 e <sup>-9</sup>  | 7.79 e <sup>-8</sup> |
| KEGG_CALCIIUM_SIGNALING_PATHWAY [177]                             | Calcium signaling pathway                              | 22                     | 1.74 e <sup>-9</sup>  | 8.11 e <sup>-8</sup> |
| KEGG_FOCAL_ADHESION [199]                                         | Focal adhesion                                         | 21                     | 7.39 e <sup>-8</sup>  | 2.75 e <sup>-6</sup> |
| KEGG_VASCULAR_SMOOTH_MUSCLE_CONTRACTIION [115]                    | Vascular smooth muscle contraction                     | 15                     | 3.5 e <sup>-7</sup>   | 1.08 e <sup>-5</sup> |
| KEGG_DILATED_CARDIOMYOPATHY [90]                                  | Dilated cardiomyopathy                                 | 13                     | 6.39 e <sup>-7</sup>  | 1.7 e <sup>-5</sup>  |
| KEGG_HYPERTROPHIC_CARDIOMYOPATHY_HCM [83]                         | Hypertrophic cardiomyopathy (HCM)                      | 12                     | 1.7 e <sup>-6</sup>   | 3.95 e <sup>-5</sup> |
| KEGG_ECM_RECEPTOR_INTERACTION [84]                                | ECM-receptor interaction                               | 12                     | 1.94 e <sup>-6</sup>  | 4 e <sup>-5</sup>    |
| KEGG_TYPE_II_DIABETES_MELLITUS [47]                               | Type II diabetes mellitus                              | 8                      | 2.72 e <sup>-5</sup>  | 5.06 e <sup>-4</sup> |
| KEGG_NEUROACTIVE_LIGAND_RECEPTOR_INTERTERACTION [272]             | Neuroactive ligand-receptor interaction                | 20                     | 3.78 e <sup>-5</sup>  | 6.39 e <sup>-4</sup> |
| KEGG_CELL_ADHESION_MOLECULES_CAMS [133]                           | Cell adhesion molecules (CAMs)                         | 13                     | 4.95 e <sup>-5</sup>  | 7.68 e <sup>-4</sup> |
| KEGG_GNRH_SIGNALING_PATHWAY [101]                                 | GnRH signaling pathway                                 | 11                     | 6.95 e <sup>-5</sup>  | 9.95 e <sup>-4</sup> |
| KEGG_PHOSPHATIDYLINOSITOL_SIGNALING_SY_SYSTEM [76]                | Phosphatidylinositol signaling system                  | 9                      | 1.65 e <sup>-4</sup>  | 2.19 e <sup>-3</sup> |
| KEGG_PURINE_METABOLISM [159]                                      | Purine metabolism                                      | 13                     | 3 e <sup>-4</sup>     | 3.72 e <sup>-3</sup> |
| KEGG_SMALL_CELL_LUNG_CANCER [84]                                  | Small cell lung cancer                                 | 9                      | 3.54 e <sup>-4</sup>  | 4.11 e <sup>-3</sup> |
| KEGG_LONG_TERM_DEPRESSION [70]                                    | Long-term depression                                   | 8                      | 4.82 e <sup>-4</sup>  | 5.07 e <sup>-3</sup> |
| KEGG_CHEMOKINE_SIGNALING_PATHWAY [189]                            | Chemokine signaling pathway                            | 14                     | 4.91 e <sup>-4</sup>  | 5.07 e <sup>-3</sup> |
| KEGG_HEDGEHOG_SIGNALING_PATHWAY [56]                              | Hedgehog signaling pathway                             | 7                      | 6.25 e <sup>-4</sup>  | 6.12 e <sup>-3</sup> |
| KEGG_MAPK_SIGNALING_PATHWAY [267]                                 | MAPK signaling pathway                                 | 17                     | 7.44 e <sup>-4</sup>  | 6.92 e <sup>-3</sup> |
| KEGG_CARDIAC_MUSCLE_CONTRACTION [78]                              | Cardiac muscle contraction                             | 8                      | 9.96 e <sup>-4</sup>  | 8.82 e <sup>-3</sup> |
| KEGG_REGULATION_OF_ACTIN_CYTOSKELETON [213]                       | Regulation of actin cytoskeleton                       | 14                     | 1.56 e <sup>-3</sup>  | 1.32 e <sup>-2</sup> |
| KEGG_GLYCEROLIPID_METABOLISM [49]                                 | Glycerolipid metabolism                                | 6                      | 1.7 e <sup>-3</sup>   | 1.37 e <sup>-2</sup> |
| KEGG_GAP_JUNCTION [90]                                            | Gap junction                                           | 8                      | 2.51 e <sup>-3</sup>  | 1.9 e <sup>-2</sup>  |
| KEGG_TIGHT_JUNCTION [132]                                         | Tight junction                                         | 10                     | 2.55 e <sup>-3</sup>  | 1.9 e <sup>-2</sup>  |
| KEGG_ADHERENS_JUNCTION [73]                                       | Adherens junction                                      | 7                      | 3 e <sup>-3</sup>     | 2.12 e <sup>-2</sup> |
| KEGG_BASAL_CELL_CARCINOMA [55]                                    | Basal cell carcinoma                                   | 6                      | 3.08 e <sup>-3</sup>  | 2.12 e <sup>-2</sup> |
| KEGG_NICOTINATE_AND_NICOTINAMIDE_METABTABOLISM [24]               | Nicotinate and nicotinamide metabolism                 | 4                      | 3.26 e <sup>-3</sup>  | 2.17 e <sup>-2</sup> |
| KEGG_ALZHEIMERS_DISEASE [165]                                     | Alzheimer's disease                                    | 11                     | 4.28 e <sup>-3</sup>  | 2.75 e <sup>-2</sup> |
| KEGG_MELANOGENESIS [101]                                          | Melanogenesis                                          | 8                      | 5.09 e <sup>-3</sup>  | 3.16 e <sup>-2</sup> |
| KEGG_WNT_SIGNALING_PATHWAY [150]                                  | Wnt signaling pathway                                  | 10                     | 6.3 e <sup>-3</sup>   | 3.78 e <sup>-2</sup> |
| KEGG_O_GLYCAN_BIOSYNTHESIS [30]                                   | O-Glycan biosynthesis                                  | 4                      | 7.44 e <sup>-3</sup>  | 4.3 e <sup>-2</sup>  |
| KEGG_ERBB_SIGNALING_PATHWAY [87]                                  | ErbB signaling pathway                                 | 7                      | 7.87 e <sup>-3</sup>  | 4.3 e <sup>-2</sup>  |
| KEGG_HEMATOPOIETIC_CELL_LINEAGE [87]                              | Hematopoietic cell lineage                             | 7                      | 7.87 e <sup>-3</sup>  | 4.3 e <sup>-2</sup>  |
| KEGG_ADIPOCYTOKINE_SIGNALING_PATHWAY [67]                         | Adipocytokine signaling pathway                        | 6                      | 8.15 e <sup>-3</sup>  | 4.33 e <sup>-2</sup> |

**Supplementary Table 13. The 16 KEGG pathways overrepresented by genes in Kinship model in replication sample with FDR < 0.05.**

| Gene Set Name [# Genes (K)]                                       | Description                                            | # Genes in Overlap (k) | p-value              | FDR q-value          |
|-------------------------------------------------------------------|--------------------------------------------------------|------------------------|----------------------|----------------------|
| KEGG_PATHWAYS_IN_CANCER [325]                                     | Pathways in cancer                                     | 28                     | 7.2 e <sup>-8</sup>  | 1.34 e <sup>-5</sup> |
| KEGG_MAPK_SIGNALING_PATHWAY [267]                                 | MAPK signaling pathway                                 | 23                     | 1.04 e <sup>-6</sup> | 9.63 e <sup>-5</sup> |
| KEGG_T_CELL_RECEPTOR_SIGNALING_PATHWAY [108]                      | T cell receptor signaling pathway                      | 13                     | 6.57 e <sup>-6</sup> | 4.07 e <sup>-4</sup> |
| KEGG_ARRHYTHMOGENIC_RIGHT_VENTRICULAR_AR_CARDIOMYOPATHY_ARVC [74] | Arrhythmogenic right ventricular cardiomyopathy (ARVC) | 10                     | 2.74 e <sup>-5</sup> | 1.06 e <sup>-3</sup> |
| KEGG_FOCAL_ADHESION [199]                                         | Focal adhesion                                         | 17                     | 2.85 e <sup>-5</sup> | 1.06 e <sup>-3</sup> |
| KEGG_B_CELL_RECEPTOR_SIGNALING_PATHWAY [75]                       | B cell receptor signaling pathway                      | 9                      | 1.75 e <sup>-4</sup> | 5.43 e <sup>-3</sup> |
| KEGG_WNT_SIGNALING_PATHWAY [150]                                  | Wnt signaling pathway                                  | 13                     | 2.09 e <sup>-4</sup> | 5.56 e <sup>-3</sup> |
| KEGG_NATURAL_KILLER_CELL_MEDIATED_CYTOTOXICITY [137]              | Natural killer cell mediated cytotoxicity              | 12                     | 3.28 e <sup>-4</sup> | 7.63 e <sup>-3</sup> |
| KEGG_CELL_CYCLE [124]                                             | Cell cycle                                             | 11                     | 5.16 e <sup>-4</sup> | 1.07 e <sup>-2</sup> |
| KEGG_MELANOMA [71]                                                | Melanoma                                               | 8                      | 6.12 e <sup>-4</sup> | 1.14 e <sup>-2</sup> |
| KEGG_OLFACTORY_TRANSDUCTION [389]                                 | Olfactory transduction                                 | 22                     | 9.05 e <sup>-4</sup> | 1.53 e <sup>-2</sup> |
| KEGG_ECM_RECEPTOR_INTERACTION [84]                                | ECM-receptor interaction                               | 8                      | 1.85 e <sup>-3</sup> | 2.87 e <sup>-2</sup> |
| KEGG_PARKINSONS_DISEASE [128]                                     | Parkinson's disease                                    | 10                     | 2.38 e <sup>-3</sup> | 3.41 e <sup>-2</sup> |
| KEGG_METABOLISM_OF_XENOBIOTICS_BY_CYTOCHROME_P450 [70]            | Metabolism of xenobiotics by cytochrome P450           | 7                      | 2.66 e <sup>-3</sup> | 3.54 e <sup>-2</sup> |
| KEGG_DRUG_METABOLISM_CYTOCHROME_P450 [72]                         | Drug metabolism - cytochrome P450                      | 7                      | 3.13 e <sup>-3</sup> | 3.88 e <sup>-2</sup> |
| KEGG_ADHERENS_JUNCTION [73]                                       | Adherens junction                                      | 7                      | 3.38 e <sup>-3</sup> | 3.93 e <sup>-2</sup> |

**Supplementary Table 14. 12 KEGG pathways overrepresented by genes in LME model in replication sample with FDR <0.05.**

| Gene Set Name [# Genes (K)]                                       | Description                                            | # Genes in Overlap (k) | p-value              | FDR q-value          |
|-------------------------------------------------------------------|--------------------------------------------------------|------------------------|----------------------|----------------------|
| KEGG_PATHWAYS_IN_CANCER [325]                                     | Pathways in cancer                                     | 24                     | 3.26 e <sup>-6</sup> | 6.07 e <sup>-4</sup> |
| KEGG_MAPK_SIGNALING_PATHWAY [267]                                 | MAPK signaling pathway                                 | 20                     | 1.7 e <sup>-5</sup>  | 1.15 e <sup>-3</sup> |
| KEGG_T_CELL_RECEPTOR_SIGNALING_PATHWAY [108]                      | T cell receptor signaling pathway                      | 12                     | 1.86 e <sup>-5</sup> | 1.15 e <sup>-3</sup> |
| KEGG_FOCAL_ADHESION [199]                                         | Focal adhesion                                         | 16                     | 4.98 e <sup>-5</sup> | 2.32 e <sup>-3</sup> |
| KEGG_ARRHYTHMOGENIC_RIGHT_VENTRICULAR_AR_CARDIOMYOPATHY_ARVC [74] | Arrhythmogenic right ventricular cardiomyopathy (ARVC) | 9                      | 1.01 e <sup>-4</sup> | 3.75 e <sup>-3</sup> |
| KEGG_WNT_SIGNALING_PATHWAY [150]                                  | Wnt signaling pathway                                  | 12                     | 4.41 e <sup>-4</sup> | 1.37 e <sup>-2</sup> |
| KEGG_B_CELL_RECEPTOR_SIGNALING_PATHWAY [75]                       | B cell receptor signaling pathway                      | 8                      | 6 e <sup>-4</sup>    | 1.6 e <sup>-2</sup>  |
| KEGG_PARKINSONS_DISEASE [128]                                     | Parkinson's disease                                    | 10                     | 1.54 e <sup>-3</sup> | 3.59 e <sup>-2</sup> |
| KEGG_METABOLISM_OF_XENOBIOTICS_BY_CYTOCHROME_P450 [70]            | Metabolism of xenobiotics by cytochrome P450           | 7                      | 1.91 e <sup>-3</sup> | 3.94 e <sup>-2</sup> |
| KEGG_DRUG_METABOLISM_CYTOCHROME_P450 [72]                         | Drug metabolism - cytochrome P450                      | 7                      | 2.25 e <sup>-3</sup> | 3.95 e <sup>-2</sup> |
| KEGG_ADHERENS_JUNCTION [73]                                       | Adherens junction                                      | 7                      | 2.43 e <sup>-3</sup> | 3.95 e <sup>-2</sup> |
| KEGG_NATURAL_KILLER_CELL_MEDIATED_CYTOTOXICITY [137]              | Natural killer cell mediated cytotoxicity              | 10                     | 2.55 e <sup>-3</sup> | 3.95 e <sup>-2</sup> |

**Supplementary Table 15. The 28 KEGG pathways overrepresented by overlapped genes in GCC models in both studies with FDR < 0.05.**

| Gene Set Name [# Genes (K)]                                       | Description                                            | # Genes in Overlap (k) | p-value              | FDR q-value          |
|-------------------------------------------------------------------|--------------------------------------------------------|------------------------|----------------------|----------------------|
| KEGG_ARRHYTHMOGENIC_RIGHT_VENTRICULAR_AR_CARDIOMYOPATHY_ARVC [74] | Arrhythmogenic right ventricular cardiomyopathy (ARVC) | 10                     | 2.83 e <sup>-8</sup> | 2.11 e <sup>-6</sup> |
| KEGG_PATHWAYS_IN_CANCER [325]                                     | Pathways in cancer                                     | 19                     | 3.4 e <sup>-8</sup>  | 2.11 e <sup>-6</sup> |
| KEGG_CALCIIUM_SIGNALING_PATHWAY [177]                             | Calcium signaling pathway                              | 14                     | 5.51 e <sup>-8</sup> | 2.56 e <sup>-6</sup> |
| KEGG_AXON_GUIDANCE [129]                                          | Axon guidance                                          | 12                     | 8.33 e <sup>-8</sup> | 3.1 e <sup>-6</sup>  |
| KEGG_FOCAL_ADHESION [199]                                         | Focal adhesion                                         | 13                     | 1.46 e <sup>-6</sup> | 4.53 e <sup>-5</sup> |
| KEGG_HYPERTROPHIC_CARDIOMYOPATHY_HCM [83]                         | Hypertrophic cardiomyopathy (HCM)                      | 8                      | 9.37 e <sup>-6</sup> | 2.49 e <sup>-4</sup> |
| KEGG_DILATED_CARDIOMYOPATHY [90]                                  | Dilated cardiomyopathy                                 | 8                      | 1.71 e <sup>-5</sup> | 3.97 e <sup>-4</sup> |
| KEGG_CELL_ADHESION_MOLECULES_CAMS [133]                           | Cell adhesion molecules (CAMs)                         | 9                      | 4.58 e <sup>-5</sup> | 9.47 e <sup>-4</sup> |
| KEGG_ECM_RECEPTOR_INTERACTION [84]                                | ECM-receptor interaction                               | 7                      | 8.71 e <sup>-5</sup> | 1.62 e <sup>-3</sup> |
| KEGG_LONG_TERM_DEPRESSION [70]                                    | Long-term depression                                   | 6                      | 2.39 e <sup>-4</sup> | 3.71 e <sup>-3</sup> |
| KEGG_LONG_TERM_POTENTIATION [70]                                  | Long-term potentiation                                 | 6                      | 2.39 e <sup>-4</sup> | 3.71 e <sup>-3</sup> |
| KEGG_GNRH_SIGNALING_PATHWAY [101]                                 | GnRH signaling pathway                                 | 7                      | 2.76 e <sup>-4</sup> | 3.85 e <sup>-3</sup> |
| KEGG_TYPE_II_DIABETES_MELLITUS [47]                               | Type II diabetes mellitus                              | 5                      | 2.9 e <sup>-4</sup>  | 3.85 e <sup>-3</sup> |
| KEGG_BASAL_CELL_CARCINOMA [55]                                    | Basal cell carcinoma                                   | 5                      | 6.06 e <sup>-4</sup> | 7.45 e <sup>-3</sup> |
| KEGG_SMALL_CELL_LUNG_CANCER [84]                                  | Small cell lung cancer                                 | 6                      | 6.41 e <sup>-4</sup> | 7.45 e <sup>-3</sup> |
| KEGG_GAP_JUNCTION [90]                                            | Gap junction                                           | 6                      | 9.22 e <sup>-4</sup> | 1.01 e <sup>-2</sup> |
| KEGG_TIGHT_JUNCTION [132]                                         | Tight junction                                         | 7                      | 1.36 e <sup>-3</sup> | 1.41 e <sup>-2</sup> |
| KEGG_REGULATION_OF_ACTIN_CYTOSKELETON [213]                       | Regulation of actin cytoskeleton                       | 9                      | 1.48 e <sup>-3</sup> | 1.45 e <sup>-2</sup> |
| KEGG_ADHERENS_JUNCTION [73]                                       | Adherens junction                                      | 5                      | 2.18 e <sup>-3</sup> | 2.03 e <sup>-2</sup> |
| KEGG_NEUROACTIVE_LIGAND_RECEPTOR_INTERACTION [272]                | Neuroactive ligand-receptor interaction                | 10                     | 2.32 e <sup>-3</sup> | 2.05 e <sup>-2</sup> |
| KEGG_PHOSPHATIDYLIINOSITOL_SIGNALING_SYSTEM [76]                  | Phosphatidylinositol signaling system                  | 5                      | 2.6 e <sup>-3</sup>  | 2.2 e <sup>-2</sup>  |
| KEGG_NOTCH_SIGNALING_PATHWAY [47]                                 | Notch signaling pathway                                | 4                      | 2.76 e <sup>-3</sup> | 2.23 e <sup>-2</sup> |
| KEGG_CARDIAC_MUSCLE_CONTRACTION [78]                              | Cardiac muscle contraction                             | 5                      | 2.91 e <sup>-3</sup> | 2.26 e <sup>-2</sup> |
| KEGG_ERBB_SIGNALING_PATHWAY [87]                                  | ErbB signaling pathway                                 | 5                      | 4.66 e <sup>-3</sup> | 3.4 e <sup>-2</sup>  |
| KEGG_ALZHEIMERS_DISEASE [165]                                     | Alzheimer's disease                                    | 7                      | 4.75 e <sup>-3</sup> | 3.4 e <sup>-2</sup>  |
| KEGG_HEDGEHOG_SIGNALING_PATHWAY [56]                              | Hedgehog signaling pathway                             | 4                      | 5.2 e <sup>-3</sup>  | 3.58 e <sup>-2</sup> |
| KEGG_MAPK_SIGNALING_PATHWAY [267]                                 | MAPK signaling pathway                                 | 9                      | 6.57 e <sup>-3</sup> | 4.36 e <sup>-2</sup> |
